# Supplementary material for: Environmental Restrictors to Occupational Participation in Old Age: Exploring Differences across Gender in Puerto Rico
Source: MDPI journal article supplement (doi:10.3390/ijerph120911288), 2015-09-10
Supplement: s1 [file s1]

# Environmental Restrictors to Occupational Participation in Old Age: Exploring Differences across Gender in Puerto Rico

## Interview Guide

Code number: \_\_\_\_\_ Interviewer: \_\_\_\_\_  
Date: \_\_\_\_\_ Duration of the interview: \_\_\_\_\_  
Interview context description: \_\_\_\_\_

Participant’s characteristics: \_\_\_\_\_

**Preamble:** I want to ask you about your experience related to participating in the activities of daily living as an older adult who lives alone. I am particularly interested in what things do you think contribute to experiencing difficulties to engage in the activities that you want to do every day.

| Questions                                                                                                                                                                                                                                                                                                                       | Field Notes |
|---------------------------------------------------------------------------------------------------------------------------------------------------------------------------------------------------------------------------------------------------------------------------------------------------------------------------------|-------------|
| <b>Meaning of occupation:</b><br><br>(1). What are your most important activities of daily living?                                                                                                                                                                                                                              |             |
| <b>Experience of occupational challenges</b><br><br>(2). What kind of difficulties have you experienced in participating in daily activities?<br><br>(3). What do you think are the barriers or obstacles to do what you want to do every day?<br><br>(4). What is the hardest thing for you as an older adult who lives alone? |             |

|                                                                                                                                                               |  |
|---------------------------------------------------------------------------------------------------------------------------------------------------------------|--|
| <b>Closing question:</b><br><br>(5) Is there anything else that I should know about the obstacles that you face to participate in your daily life activities? |  |
|                                                                                                                                                               |  |

© 2015 by the authors; licensee MDPI, Basel, Switzerland. This article is an open access article distributed under the terms and conditions of the Creative Commons Attribution license (<http://creativecommons.org/licenses/by/4.0/>).
